# Supplementary material for: Highly stretchable, self-adhesive, ambient-stable, and wide-temperature adaptable hydrophobic ionogels for wearable strain sensors
Source: Royal Society of Chemistry journal article supplement (doi:10.1039/d2tc04411k), 2022-12-16
Supplement: d2tc04411k1.pdf [file d2tc04411k1.pdf]

## Supporting Information

### Highly Stretchable, Self-adhesive, Ambient-stable, and Wide-temperature Adaptable Hydrophobic Ionogels for Wearable Strain Sensor

Jiahang Liu,<sup>†,#</sup> Xuemeng Yang,<sup>†,#</sup> Min Xu,<sup>†</sup> Hongnan Zhu,<sup>†</sup> Yan Cheng,<sup>†</sup> Shuaijie, Li,<sup>†</sup> Tianci Li,<sup>†</sup> Yunhong Jiao,<sup>†,\*</sup> and Hongzan Song<sup>†,\*</sup>

<sup>†</sup>College of Chemistry & Environmental Science, Hebei University, Baoding, Hebei Province, 071002, P. R. China

#### \*Corresponding Authors

E-mails: jiaoyunhongbu@163.com (Y. J.); songhongzan@iccas.ac.cn (H. S.)



---

**Table S1 Composition of the ionogels**

| <b>Samples</b>       | <b>Amount of DAAM/wt%</b> | <b>Amount of BMIMTFSI/wt%</b> | <b>Amount of HP-A in DAAM/wt%</b> |
|----------------------|---------------------------|-------------------------------|-----------------------------------|
| <b>10%-Ionogel-1</b> | <b>10</b>                 | <b>90</b>                     | <b>0.2</b>                        |
| <b>10%-Ionogel-2</b> | <b>10</b>                 | <b>90</b>                     | <b>0.5</b>                        |
| <b>10%-Ionogel-3</b> | <b>10</b>                 | <b>90</b>                     | <b>1</b>                          |
| <b>10%-Ionogel-4</b> | <b>10</b>                 | <b>90</b>                     | <b>2</b>                          |
| <b>10%-Ionogel-5</b> | <b>10</b>                 | <b>90</b>                     | <b>5</b>                          |
| <b>15%-Ionogel-1</b> | <b>15</b>                 | <b>85</b>                     | <b>0.2</b>                        |
| <b>20%-Ionogel-1</b> | <b>20</b>                 | <b>80</b>                     | <b>0.2</b>                        |
| <b>20%-Ionogel-2</b> | <b>20</b>                 | <b>80</b>                     | <b>0.5</b>                        |
| <b>20%-Ionogel-3</b> | <b>20</b>                 | <b>80</b>                     | <b>1</b>                          |
| <b>20%-Ionogel-4</b> | <b>20</b>                 | <b>80</b>                     | <b>2</b>                          |
| <b>20%-Ionogel-5</b> | <b>20</b>                 | <b>80</b>                     | <b>5</b>                          |

**Table S2 Mechanical properties of the ionogels**

---

| <b>Samples</b>       | <b>Elongation at break (%)</b> | <b>Tensile strength (kPa)</b> | <b>Young's modulus (kPa)</b> | <b>Toughness (kJ/m<sup>3</sup>)</b> |
|----------------------|--------------------------------|-------------------------------|------------------------------|-------------------------------------|
| <b>10%-Ionogel-1</b> | <b>1090</b>                    | <b>98.9</b>                   | <b>15</b>                    | <b>420.5</b>                        |
| <b>15%-Ionogel-1</b> | <b>1120</b>                    | <b>126.9</b>                  | <b>25</b>                    | <b>761.2</b>                        |
| <b>20%-Ionogel-1</b> | <b>1170</b>                    | <b>142.1</b>                  | <b>38</b>                    | <b>872.6</b>                        |
| <b>20%-Ionogel-2</b> | <b>830</b>                     | <b>158.5</b>                  | <b>188</b>                   | <b>745.7</b>                        |
| <b>20%-Ionogel-3</b> | <b>330</b>                     | <b>119.1</b>                  | <b>255</b>                   | <b>206.0</b>                        |
| <b>20%-Ionogel-5</b> | <b>85</b>                      | <b>59.1</b>                   | <b>365</b>                   | <b>26.9</b>                         |

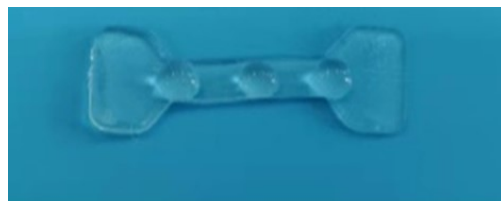

WCA=92.7°

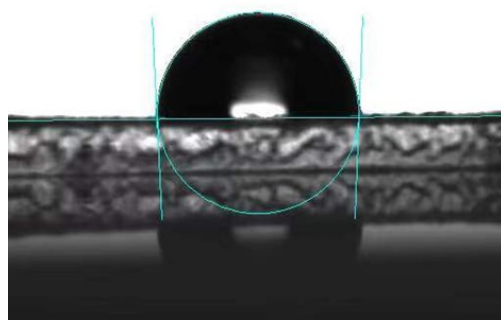

**Fig. S1** Photographs showing the WCA of the surface of hydrophobic ionogel.

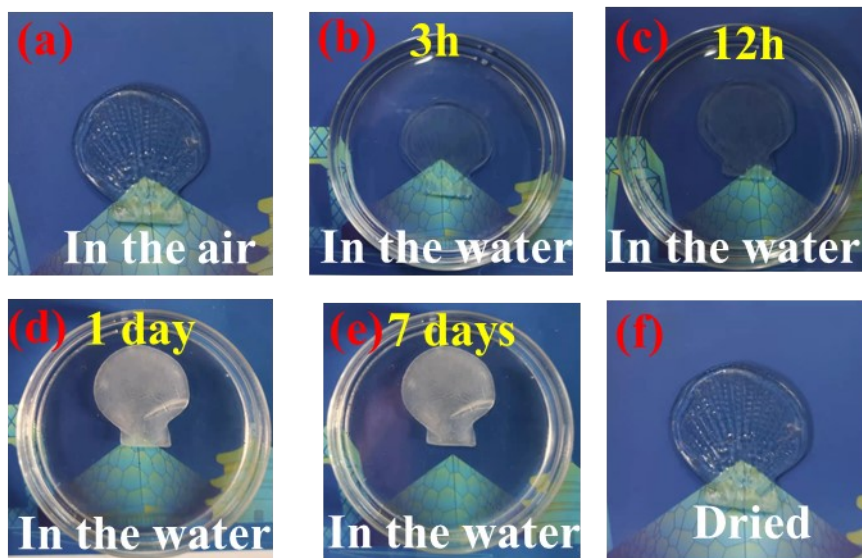

**Fig. S2** Digital pictures of the ionogels in air (a), under water with different time (b-e), and the dried sample (f).

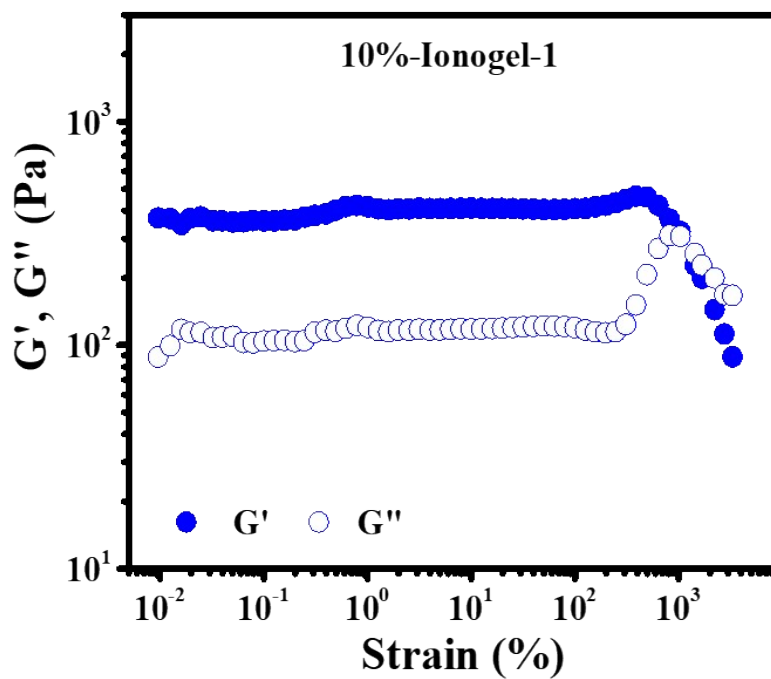

Fig. S3 Strain sweep curve of the sample 10%-Ionogel-1.

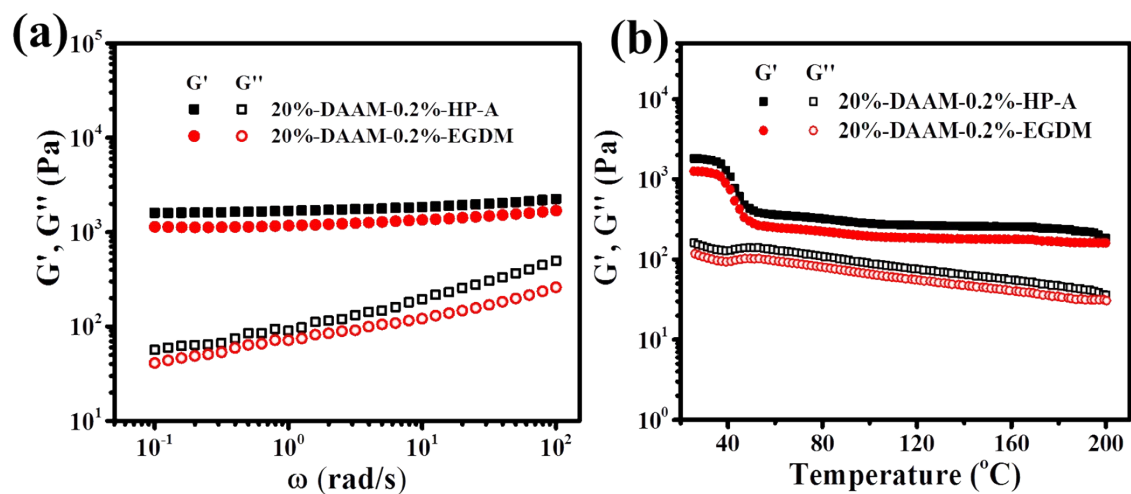

Fig. S4 (a) Changes of  $G'$  and  $G''$  with frequency for the 20%-Ionogel with HP-A and EGDM. (b) Changes of  $G'$  and  $G''$  with temperature for the 20%-Ionogel with HP-A and EGDM.

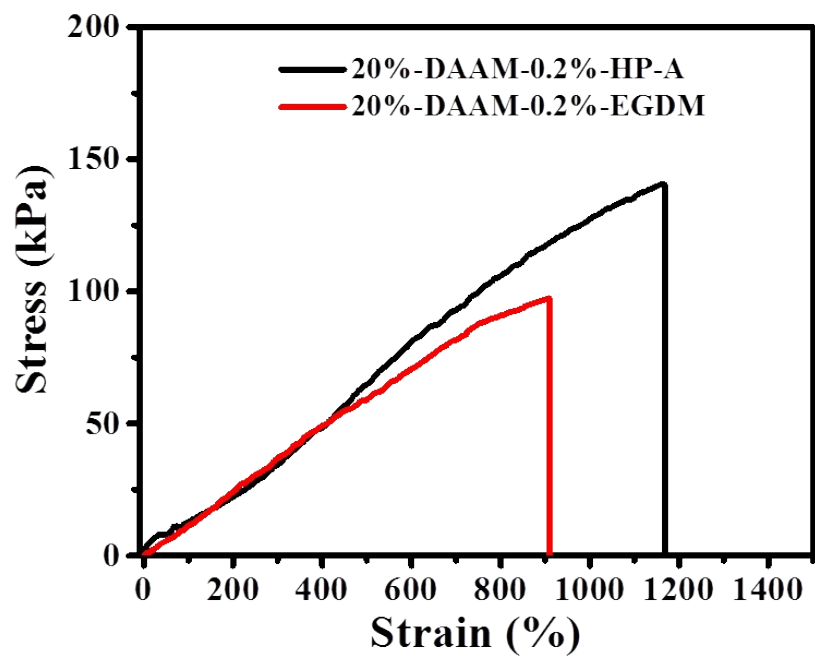

Fig. S5 Typical monotonic tensile stress-strain curves of the ionogel with HP-A and EGDM.

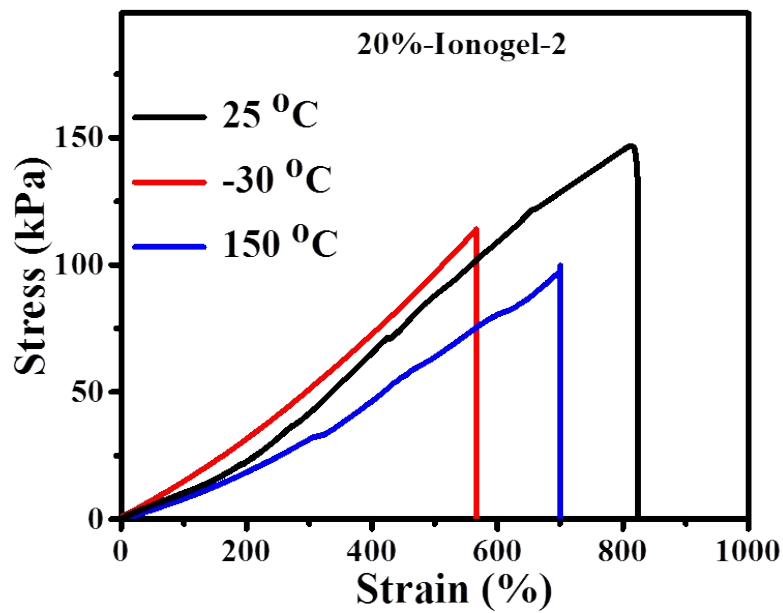

Fig. S6 Monotonic Tensile stress-strain curves of 20%-Ionogel-2 at -30 °C, 25 °C, and 150 °C.

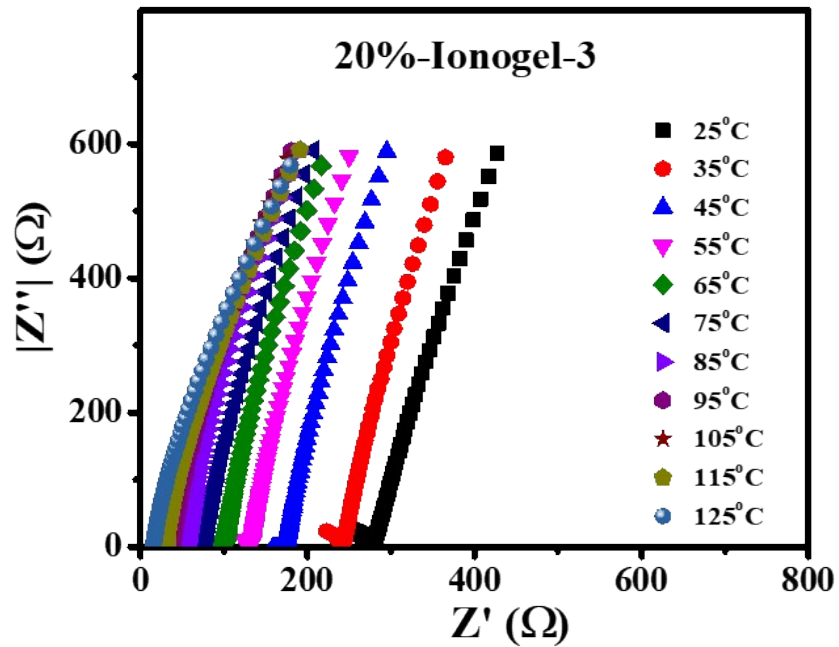

Fig. S7 The temperature dependence of impedance for 20%-Ionogel-3.

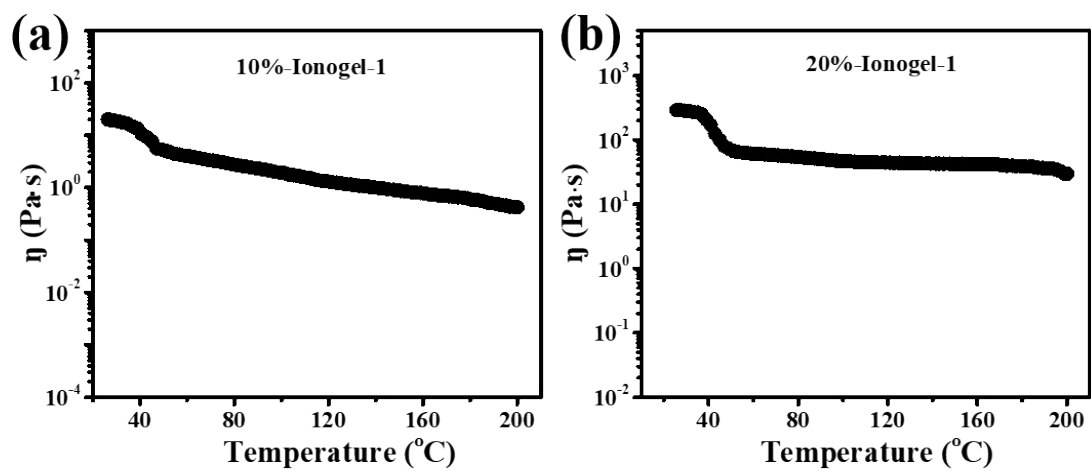

Fig. S8 The temperature dependence of viscosity for (a) 10%-Ionogel-1 and (b) 20%-Ionogel-1.



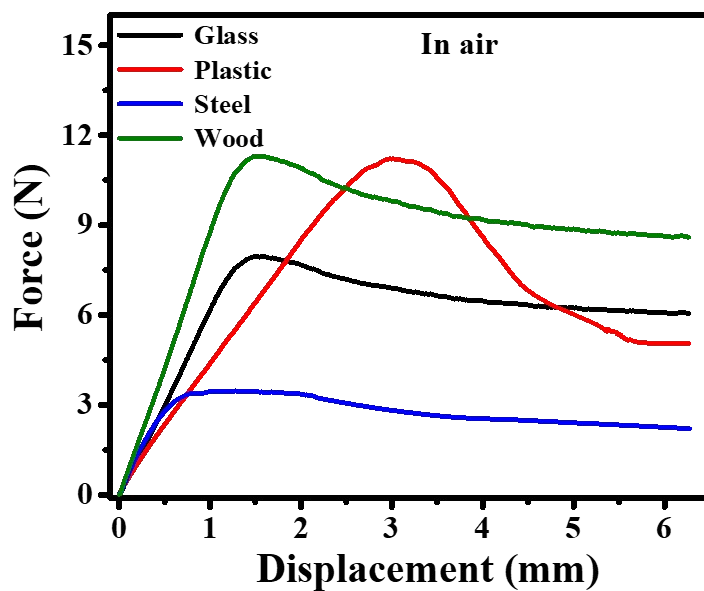

Fig. S9 Typical lap shear curves of ionogel with various substrates in air.

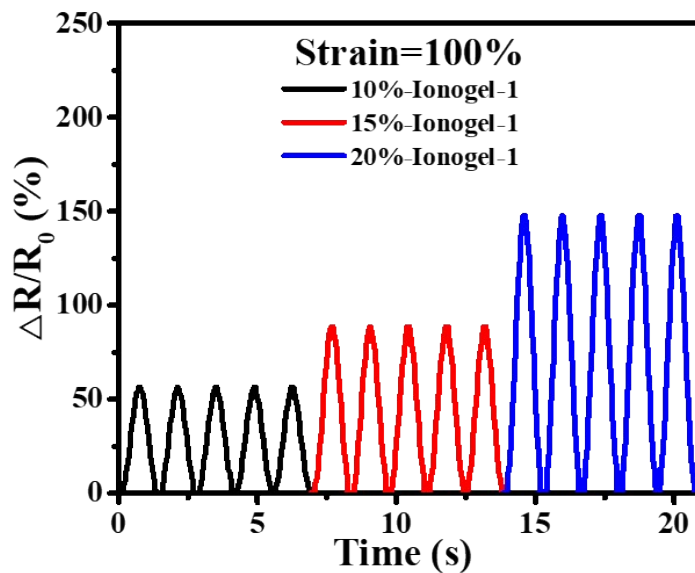

Fig. S10 The relative resistance ( $\Delta R/R_0$ ) of the sensors with different content of DAAM (strain=100%).

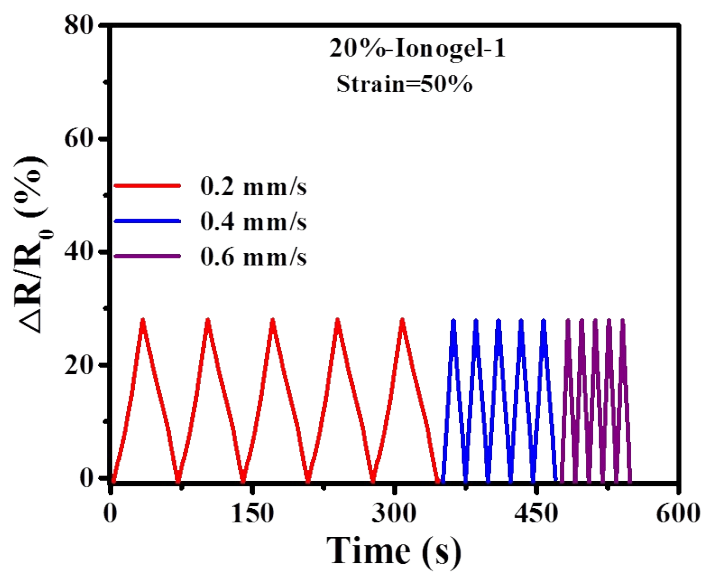

**Fig. S11** The relative resistance variations ( $\Delta R/R_0$ ) of the sensor at various loading rates.
